# Supplementary material for: Add-on Protective Effect of Pentoxifylline in Advanced Chronic Kidney Disease Treated with Renin-Angiotensin-Aldosterone System Blockade - A Nationwide Database Analysis
Source: PubMed Central journal article supplement (PMC4661470; doi:10.1038/srep17150), 2015-11-27
Supplement: srep17150-s1.pdf [file srep17150-s1.pdf]

**Add-on Protective Effect of Pentoxifylline in Advanced Chronic  
Kidney Disease Treated with Renin-Angiotensin-Aldosterone System  
Blockade - A Nationwide Database Analysis**

Ko-Lin Kuo<sup>1,2</sup>, Szu-Chun Hung<sup>1,2</sup>, Jia-Sin Liu<sup>3</sup>, Yu-Kang Chang<sup>3</sup>, Chih-Cheng  
Hsu<sup>3,4,5</sup>, Der-Cherng Tarn<sup>5,6,7</sup>

<sup>1</sup>Division of Nephrology, Taipei Tzu Chi Hospital, Buddhist Tzu Chi Medical Foundation; <sup>2</sup>School of Medicine, Tzu Chi University, Hualien; <sup>3</sup>Institute of Population Health Sciences, National Health Research Institutes, Taiwan; <sup>4</sup>Department of Health Services Administration, China Medical University, Taichung, Taiwan; <sup>5</sup>Institute of Clinical Medicine and <sup>6</sup>Department and Institute of Physiology, National Yang-Ming University, Taipei, Taiwan; and <sup>7</sup>Division of Nephrology, Department of Medicine, Taipei Veterans General Hospital

## **Supplementary Online Content**

***Supplemental Figure 1.*** Histograms of propensity score (A) before and (B) after matching.

***Supplemental Table 1.*** The renin-angiotensin-aldosterone system blockade analyzed in the study.

***Supplemental Table 2.*** Risks of study outcomes in ACEI/ARB treated pre-dialysis stage 5 CKD patients with pentoxifylline exposure within 30 days and an observation period beginning 30 days after the index date.

***Supplemental Table 3.*** Risks of study outcomes in ACEI/ARB treated pre-dialysis stage 5 CKD patients with pentoxifylline exposure within 60 days and an observation period beginning 60 days after the index date.

***Supplemental Table 4.*** Risks of study outcomes in ACEI/ARB treated pre-dialysis stage 5 CKD patients with pentoxifylline exposure within 120 days and an observation period beginning 120 days after the index date.

***Supplemental Table 5.*** Risk of study outcomes in different statistical models by adding pentoxifylline in ACEI/ARB treatment among pre-dialysis stage 5 CKD patients.

***Supplemental Table 6.*** Risk of study outcomes by adding pentoxifylline in ACEI/ARB treatment among pre-dialysis stage 5 CKD patients, years 2000-2007.

**Supplemental Figure 1.** Histograms of propensity score (A) before and (B) after matching.

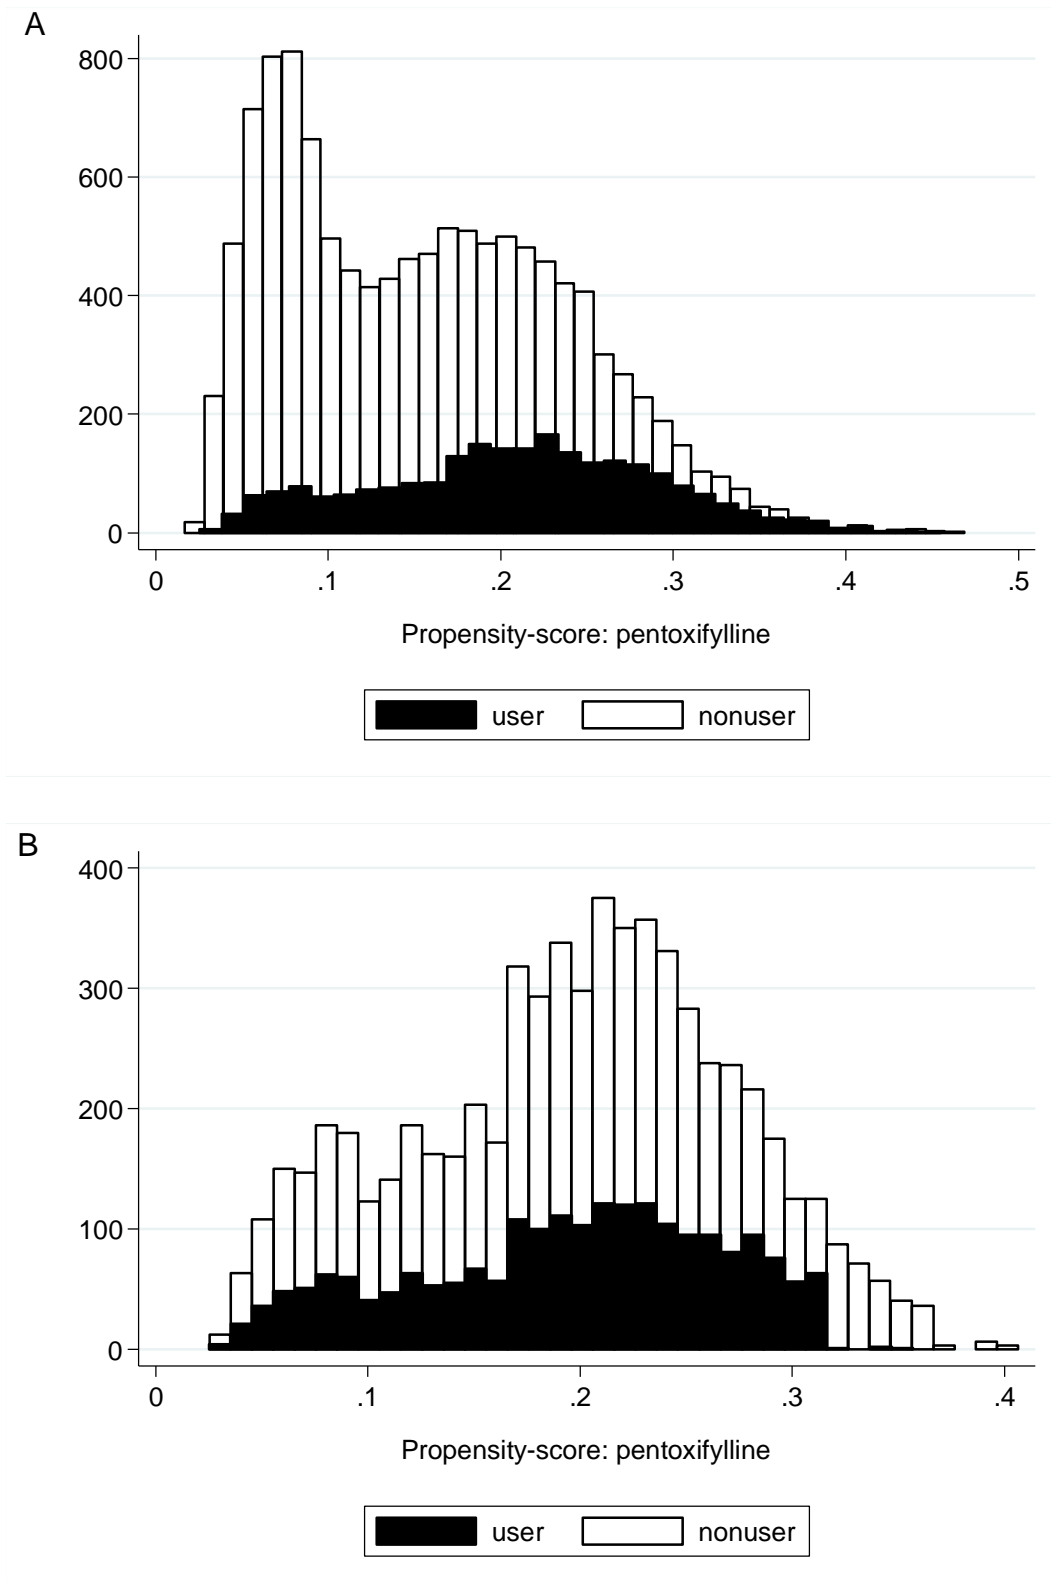

**Supplemental Table 1.** The renin-angiotensin-aldosterone system blockade analyzed in the study.

| <b>Drug classification</b>               | <b>Component name</b>                                                                                             |
|------------------------------------------|-------------------------------------------------------------------------------------------------------------------|
| Angiotensin-converting enzyme inhibitors | Benazepril, Captopril, Cilazapril, Enalapril, Fosinopril, Imidapril, Lisinopril, Perindopril, Quinapril, Ramipril |
| Angiotensin II receptor blockers         | Candesartan, Eprosartan, Irbesartan, Losartan, Olmesartan, Telmisartan, Valsartan                                 |

**Supplemental Table 2.** Risks of study outcomes in ACEI/ARB treated pre-dialysis stage 5 CKD patients with pentoxifylline exposure within 30 days and an observation period beginning 30 days after the index date.

|                                    | Pentoxifylline user |      | Pentoxifylline nonuser |       | User vs. nonuser |                          |
|------------------------------------|---------------------|------|------------------------|-------|------------------|--------------------------|
|                                    | N = 3216            |      | N = 15996              |       | Crude HR         | Adjusted HR <sup>†</sup> |
|                                    | n                   | IR   | n                      | IR    |                  |                          |
| <b>Long-term dialysis</b>          |                     |      |                        |       |                  |                          |
| ACEI/ARB                           | 1612                | 62.0 | 12330                  | 81.8  | 0.74 (0.70-0.78) | 0.95 (0.89-0.99)         |
| ARB monotherapy                    | 1057                | 62.0 | 6846                   | 81.8  | 0.74 (0.69-0.79) | 0.91 (0.85-0.97)         |
| ACEI monotherapy                   | 345                 | 61.6 | 3399                   | 74.8  | 0.80 (0.72-0.89) | 1.03 (0.91-1.15)         |
| ACEI and ARB combination           | 210                 | 63.1 | 2085                   | 96.7  | 0.63 (0.55-0.73) | 0.98 (0.84-1.15)         |
| <b>Death</b>                       |                     |      |                        |       |                  |                          |
| ACEI/ARB                           | 409                 | 15.7 | 3211                   | 21.3  | 0.72 (0.65-0.80) | 0.95 (0.85-1.06)         |
| ARB monotherapy                    | 232                 | 13.6 | 1535                   | 18.3  | 0.72 (0.63-0.83) | 0.90 (0.78-1.04)         |
| ACEI monotherapy                   | 97                  | 17.3 | 1064                   | 23.4  | 0.72 (0.58-0.88) | 1.05 (0.85-1.31)         |
| ACEI and ARB combination           | 80                  | 24.0 | 612                    | 28.4  | 0.80 (0.63-1.01) | 0.93 (0.73-1.20)         |
| <b>Long-term dialysis or death</b> |                     |      |                        |       |                  |                          |
| ACEI/ARB                           | 2021                | 77.8 | 15541                  | 103.2 | 0.73 (0.70-0.77) | 0.95 (0.90-0.99)         |
| ARB monotherapy                    | 1289                | 75.5 | 8381                   | 100.2 | 0.74 (0.69-0.78) | 0.91 (0.85-0.97)         |
| ACEI monotherapy                   | 442                 | 79.0 | 4463                   | 98.2  | 0.78 (0.71-0.86) | 1.03 (0.93-1.14)         |
| ACEI and ARB combination           | 290                 | 87.1 | 2697                   | 125   | 0.67 (0.59-0.76) | 0.98 (0.86-1.11)         |

Abbreviations: ACEI, angiotensin converting enzyme inhibitor; ARB, angiotensin II receptor blocker; CI, confidence interval; CKD, chronic kidney disease; HR, hazard ratio; IR: incidence rate, per 100 person-years.

<sup>†</sup>Adjusted for all variables listed in Table 1.

**Supplemental Table 3.** Risks of study outcomes in ACEI/ARB treated pre-dialysis stage 5 CKD patients with pentoxifylline exposure within 60 days and an observation period beginning 60 days after the index date.

|                                    | Pentoxifylline user |      | Pentoxifylline nonuser |       | User vs. nonuser |                          |
|------------------------------------|---------------------|------|------------------------|-------|------------------|--------------------------|
|                                    | N = 2832            |      | N = 13640              |       |                  |                          |
|                                    | N                   | IR   | n                      | IR    | Crude HR         | Adjusted HR <sup>†</sup> |
| <b>Long-term dialysis</b>          |                     |      |                        |       |                  |                          |
| ACEI/ARB                           | 1612                | 67.1 | 10100                  | 75.8  | 0.86 (0.82-0.91) | 0.95 (0.89-0.99)         |
| ARB monotherapy                    | 1057                | 66.9 | 5753                   | 77.4  | 0.85 (0.79-0.90) | 0.91 (0.85-0.97)         |
| ACEI monotherapy                   | 345                 | 66.5 | 2798                   | 69    | 0.94 (0.84-1.05) | 1.03 (0.91-1.15)         |
| ACEI and ARB combination           | 210                 | 69   | 1549                   | 84.5  | 0.79 (0.68-0.91) | 0.98 (0.84-1.15)         |
| <b>Death</b>                       |                     |      |                        |       |                  |                          |
| ACEI/ARB                           | 409                 | 17   | 2801                   | 21    | 0.80 (0.72-0.89) | 0.95 (0.85-1.06)         |
| ARB monotherapy                    | 232                 | 14.7 | 1344                   | 18.1  | 0.80 (0.70-0.93) | 0.90 (0.78-1.04)         |
| ACEI monotherapy                   | 97                  | 18.7 | 931                    | 23    | 0.80 (0.65-0.99) | 1.05 (0.85-1.31)         |
| ACEI and ARB combination           | 80                  | 26.3 | 526                    | 28.7  | 0.89 (0.70-1.12) | 0.93 (0.73-1.2)          |
| <b>Long-term dialysis or death</b> |                     |      |                        |       |                  |                          |
| ACEI/ARB                           | 2021                | 84.1 | 12901                  | 96.8  | 0.85 (0.81-0.89) | 0.95 (0.90-0.99)         |
| ARB monotherapy                    | 1289                | 81.5 | 7097                   | 95.5  | 0.84 (0.79-0.89) | 0.91 (0.85-0.97)         |
| ACEI monotherapy                   | 442                 | 85.2 | 3729                   | 92    | 0.90 (0.82-0.99) | 1.03 (0.93-1.14)         |
| ACEI and ARB combination           | 290                 | 95.3 | 2075                   | 113.2 | 0.81 (0.72-0.92) | 0.98 (0.86-1.11)         |

Abbreviations: ACEI, angiotensin converting enzyme inhibitor; ARB, angiotensin II receptor blocker; CI, confidence interval; CKD, chronic kidney disease; HR, hazard ratio; IR: incidence rate, per 100 person-years.

<sup>†</sup>Adjusted for all variables listed in Table 1.

**Supplemental Table 4.** Risks of study outcomes in ACEI/ARB treated pre-dialysis stage 5 CKD patients with pentoxifylline exposure within 120 days and an observation period beginning 120 days after the index date.

|                                    | Pentoxifylline user |       | Pentoxifylline nonuser |      | User vs. nonuser |                          |
|------------------------------------|---------------------|-------|------------------------|------|------------------|--------------------------|
|                                    | N = 2135            |       | N = 10172              |      | Crude HR         | Adjusted HR <sup>†</sup> |
|                                    | n                   | IR    | n                      | IR   |                  |                          |
| <b>Long-term dialysis</b>          |                     |       |                        |      |                  |                          |
| ACEI/ARB                           | 1403                | 70.8  | 7175                   | 67.0 | 1.05 (0.99-1.11) | 0.95 (0.90-1.01)         |
| ARB monotherapy                    | 931                 | 71.0  | 4231                   | 70.6 | 0.99 (0.93-1.07) | 0.91 (0.84-0.98)         |
| ACEI monotherapy                   | 296                 | 68.9  | 1996                   | 60.3 | 1.13 (1.01-1.28) | 1.02 (0.90-1.16)         |
| ACEI and ARB combination           | 176                 | 73    | 948                    | 67.8 | 1.07 (0.91-1.25) | 1.04 (0.87-1.23)         |
| <b>Death</b>                       |                     |       |                        |      |                  |                          |
| ACEI/ARB                           | 357                 | 18.0  | 2048                   | 19.1 | 0.95 (0.85-1.06) | 0.97 (0.87-1.10)         |
| ARB monotherapy                    | 204                 | 15.6  | 1059                   | 17.7 | 0.89 (0.77-1.03) | 0.89 (0.76-1.04)         |
| ACEI monotherapy                   | 86                  | 20.0  | 652                    | 19.7 | 1.02 (0.82-1.28) | 1.17 (0.93-1.48)         |
| ACEI and ARB combination           | 67                  | 27.8  | 337                    | 24.1 | 1.15 (0.89-1.50) | 0.99 (0.75-1.31)         |
| <b>Long-term dialysis or death</b> |                     |       |                        |      |                  |                          |
| ACEI/ARB                           | 1760                | 88.8  | 9223                   | 86.2 | 1.03 (0.97-1.08) | 0.96 (0.91-1.01)         |
| ARB monotherapy                    | 1135                | 86.6  | 5290                   | 88.3 | 0.98 (0.92-1.04) | 0.91 (0.85-0.97)         |
| ACEI monotherapy                   | 382                 | 88.9  | 2648                   | 80.0 | 1.11 (0.99-1.23) | 1.05 (0.94-1.18)         |
| ACEI and ARB combination           | 243                 | 100.8 | 1285                   | 91.9 | 1.09 (0.95-1.25) | 1.03 (0.89-1.19)         |

Abbreviations: ACEI, angiotensin converting enzyme inhibitor; ARB, angiotensin II receptor blocker; CI, confidence interval; CKD, chronic kidney disease; HR, hazard ratio; IR: incidence rate, per 100 person-years.

<sup>†</sup>Adjusted for all variables listed in Table 1.

**Supplemental Table 5.** Risk of study outcomes in different statistical models by adding pentoxifylline in ACEI/ARB treatment among pre-dialysis stage 5 CKD patients.

|                                    | Intention-to-treat model | As-treated model         | Time-dependent model     |
|------------------------------------|--------------------------|--------------------------|--------------------------|
|                                    | Adjusted HR <sup>†</sup> | Adjusted HR <sup>†</sup> | Adjusted HR <sup>†</sup> |
| <b>Long-term dialysis</b>          |                          |                          |                          |
| ACEI/ARB                           | 0.94 (0.89-0.99)         | 0.93 (0.87-0.99)         | 0.85 (0.79-0.92)         |
| ARB monotherapy                    | 0.90 (0.84-0.97)         | 0.89 (0.82-0.96)         | 0.81 (0.73-0.90)         |
| ACEI monotherapy                   | 1.02 (0.91-1.15)         | 1.01 (0.88-1.16)         | 0.93 (0.79-1.09)         |
| ACEI and ARB combination           | 0.98 (0.84-1.15)         | 0.99 (0.83-1.19)         | 0.92 (0.74-1.15)         |
| <b>Death</b>                       |                          |                          |                          |
| ACEI/ARB                           | 0.95 (0.85-1.06)         | 0.76 (0.66-0.87)         | 1.21 (0.98-1.50)         |
| ARB monotherapy                    | 0.90 (0.78-1.05)         | 0.80 (0.67-0.95)         | 1.12 (0.84-1.48)         |
| ACEI monotherapy                   | 1.05 (0.84-1.30)         | 0.59 (0.42-0.83)         | 1.41 (0.92-2.17)         |
| ACEI and ARB combination           | 0.94 (0.73-1.21)         | 0.80 (0.58-1.10)         | 1.08 (0.63-1.87)         |
| <b>Long-term dialysis or death</b> |                          |                          |                          |
| ACEI/ARB                           | 0.94 (0.90-0.99)         | 0.89 (0.84-0.95)         | 0.94 (0.87-1.01)         |
| ARB monotherapy                    | 0.90 (0.85-0.96)         | 0.87 (0.81-0.94)         | 0.87 (0.79-0.95)         |
| ACEI monotherapy                   | 1.03 (0.93-1.14)         | 0.92 (0.81-1.04)         | 1.07 (0.92-1.24)         |
| ACEI and ARB combination           | 0.98 (0.86-1.12)         | 0.94 (0.81-1.10)         | 1.01 (0.82-1.22)         |

Abbreviations: ACEI, angiotensin converting enzyme inhibitor; ARB, angiotensin II receptor blocker; CI, confidence interval; CKD, chronic kidney disease; HR, hazard ratio; IR: incidence rate, per 100 person-years.

<sup>†</sup>Adjusted for all variables listed in Table 1.



**Supplemental Table 6.** Risk of study outcomes by adding pentoxifylline in ACEI/ARB treatment among pre-dialysis stage 5 CKD patients, years 2000-2007.

|                                    | Pentoxifylline user |       | Pentoxifylline nonuser |       | User vs. nonuser |                          |                  |
|------------------------------------|---------------------|-------|------------------------|-------|------------------|--------------------------|------------------|
|                                    | N                   | IR    | n                      | IR    | Crude HR         | Adjusted HR <sup>†</sup> | Adjusted HR*     |
| <b>Long-term dialysis</b>          |                     |       |                        |       |                  |                          |                  |
| ACEI/ARB                           | 1548                | 73.3  | 8090                   | 70.2  | 1.03 (0.98-1.09) | 0.94 (0.89-0.99)         | 0.95 (0.89-1.01) |
| ARB monotherapy                    | 1015                | 73.1  | 4711                   | 73.3  | 0.99 (0.92-1.06) | 0.90 (0.84-0.97)         | 0.92 (0.85-0.99) |
| ACEI monotherapy                   | 336                 | 72.0  | 2246                   | 63.1  | 1.13 (1.01-1.27) | 1.02 (0.91-1.15)         | 0.98 (0.86-1.11) |
| ACEI and ARB combination           | 197                 | 76.7  | 1133                   | 74.0  | 1.02 (0.87-1.18) | 0.98 (0.84-1.15)         | 1.01 (0.85-1.20) |
| <b>Death</b>                       |                     |       |                        |       |                  |                          |                  |
| ACEI/ARB                           | 409                 | 19.4  | 2396                   | 20.8  | 0.93 (0.84-1.04) | 0.95 (0.85-1.06)         | 0.98 (0.87-1.10) |
| ARB monotherapy                    | 232                 | 16.7  | 1193                   | 18.6  | 0.91 (0.79-1.04) | 0.90 (0.78-1.05)         | 0.95 (0.82-1.11) |
| ACEI monotherapy                   | 97                  | 20.8  | 791                    | 22.2  | 0.93 (0.75-1.15) | 1.05 (0.84-1.30)         | 1.04 (0.82-1.31) |
| ACEI and ARB combination           | 80                  | 31.1  | 412                    | 26.9  | 1.14 (0.90-1.45) | 0.94 (0.73-1.21)         | 0.92 (0.70-1.21) |
| <b>Long-term dialysis or death</b> |                     |       |                        |       |                  |                          |                  |
| ACEI/ARB                           | 1957                | 92.7  | 10486                  | 91.0  | 1.01 (0.96-1.06) | 0.94 (0.90-0.99)         | 0.95 (0.90-1.01) |
| ARB monotherapy                    | 1247                | 89.8  | 5904                   | 91.8  | 0.97 (0.92-1.03) | 0.90 (0.85-0.96)         | 0.92 (0.86-0.99) |
| ACEI monotherapy                   | 433                 | 92.8  | 3037                   | 85.3  | 1.08 (0.97-1.19) | 1.03 (0.93-1.14)         | 0.99 (0.89-1.11) |
| ACEI and ARB combination           | 277                 | 107.8 | 1545                   | 100.9 | 1.05 (0.92-1.19) | 0.98 (0.86-1.12)         | 0.99 (0.86-1.15) |

Abbreviations: ACEI, angiotensin converting enzyme inhibitor; ARB, angiotensin II receptor blocker; CI, confidence interval; CKD, chronic kidney disease; HR, hazard ratio; IR: incidence rate, per 100 person-years.

<sup>†</sup>Adjusted for all variables listed in Table 1. \*Adjusted for all variables listed in Table 1 after propensity-score matching.
